# Supplementary material for: An along-track Biogeochemical Argo modelling framework: a case study of model improvements for the Nordic seas
Source: Copernicus journal article supplement (doi:10.5194/gmd-16-6875-2023), 2023-11-28
Supplement: Supplementary file 1 [file gmd-16-6875-2023-supplement.zip]

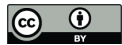

## *Supplement of*

# **An along-track Biogeochemical Argo modelling framework: a case study of model improvements for the Nordic seas**

**Veli Çağlar Yumruktepe et al.**

*Correspondence to:* Veli Çağlar Yumruktepe ([caglar.yumruktepe@nersc.no](mailto:caglar.yumruktepe@nersc.no))

- [gmd-16-6875-2023-supplement-title-page.pdf](#)
- supplementary
  - .DS\_Store
  - CHLEXP\_6901180\_only.png
  - CHLEXP\_6901181\_only.png
  - CHLEXP\_6901486\_only.png
  - CHLEXP\_6901516\_only.png
  - CHLEXP\_6901524\_only.png
  - CHLEXP\_6901527\_only.png
  - CHLEXP\_6902545\_only.png
  - CHLEXP\_6902547\_only.png
  - CHLREF\_6901180\_withMLD.png
  - CHLREF\_6901181\_withMLD.png
  - CHLREF\_6901486\_withMLD.png
  - CHLREF\_6901516\_withMLD.png
  - CHLREF\_6901524\_withMLD.png
  - CHLREF\_6901527\_withMLD.png
  - CHLREF\_6902545\_withMLD.png
  - CHLREF\_6902547\_withMLD.png
  - README.md
  - phy\_compared\_ARGO6901180.png
  - phy\_compared\_ARGO6901181.png
  - phy\_compared\_ARGO6901486.png
  - phy\_compared\_ARGO6901516.png
  - phy\_compared\_ARGO6901524.png

- phy\_compared\_ARGO6901527.png
- phy\_compared\_ARGO6902545.png
- phy\_compared\_ARGO6902547.png
- statmap\_6901180.png
- statmap\_6901181.png
- statmap\_6901486.png
- statmap\_6901516.png
- statmap\_6901524.png
- statmap\_6901527.png
- statmap\_6902545.png
- statmap\_6902547.png

The copyright of individual parts of the supplement might differ from the article licence.
